# Supplementary material for: Cell-free protein synthesis of norovirus virus-like particles
Source: Royal Society of Chemistry journal article supplement (doi:10.1039/c7ra03742b), 2017-01-01

## Supplementary Information

### Cell-free protein synthesis of norovirus virus-like particles

Jiayuan Sheng<sup>a</sup>, Shaohua Lei<sup>b</sup>, Lijuan Yuan<sup>b</sup> and Xueyang Feng<sup>a\*</sup>

- a. Department of Biological Systems Engineering, Virginia Polytechnic Institute and State University, Blacksburg, VA 24061
- b. Department of Biomedical Sciences and Pathobiology, Virginia Polytechnic Institute and State University, Blacksburg, VA 24061.

\* To whom correspondence should be addressed. X.F: Phone: (540) 231-2974. E-mail:

xueyang@vt.edu.

**Table 1S** Sequences of the constructs used in this study.

| Name      | Sequence (5'-3')                                                                                                                                                                                                                                                                                                                                                                                                                                                                                                                                                                                                                                                                                                                                                                                                                                                                                                                                                                                                                                                                                                                                                                                                                                                                                                                                                                                                                                                                                                                                                                                                                                                                                                                                                                                                                                                                        |
|-----------|-----------------------------------------------------------------------------------------------------------------------------------------------------------------------------------------------------------------------------------------------------------------------------------------------------------------------------------------------------------------------------------------------------------------------------------------------------------------------------------------------------------------------------------------------------------------------------------------------------------------------------------------------------------------------------------------------------------------------------------------------------------------------------------------------------------------------------------------------------------------------------------------------------------------------------------------------------------------------------------------------------------------------------------------------------------------------------------------------------------------------------------------------------------------------------------------------------------------------------------------------------------------------------------------------------------------------------------------------------------------------------------------------------------------------------------------------------------------------------------------------------------------------------------------------------------------------------------------------------------------------------------------------------------------------------------------------------------------------------------------------------------------------------------------------------------------------------------------------------------------------------------------|
| VP1-GII.3 | ATGTCGGTTCTCATCATCATCATCATATAGCAGCGGCATCGAAGGCCGCGCCGCTTAATTAA<br>AACCATGGCAAAGTCGACTAAGATGGCGTCGAATGACGCCGCTCCATCTAATGATGGTGCCGCCG<br>GCCTCGTCCCAGAGATCAACAGTGAGGCGATGGCGCTAGAGCCAGTGGCGGGTGCAGCGATAGC<br>AGCACCCCTCACTGGTCAGCAAAAATAAATTGATCCCTGGATTATGAATAATTTTGTGCAAGCAC<br>CTGGTGGTGAGTTCACAGTATCCCCTAGAAAATCCCCTGGTGAAGTTCTTCTCAATTTGGAATTGG<br>GTCCAGAAAATAATCCCTACTTGGCCCATCTTGCTAGAATGTATAATGGTTATGCAGGTGGATTG<br>AAGTGCAGGTGGTCTAGCTGGAAATGCGTTTACAGCAGGAAAGATAATCTTTGCAGCTATTCCC<br>CCTAATTTCCAATTGATAATCTAAGTGCAGCACAGATACAATGTGTCCACATGTGATTGTGGAT<br>GTTAGACAGCTGGAACCAGTCAACCTCCCGATGCTGACGTTGCAATAACTTTTCCATTATAAT<br>CAGGGGTCTGATTGAGATTGCGCCTAATTGCAATGCTATATACACCTCTTAGGGCAAATAACTCT<br>GGGGATGATGTCTTCACTGTGTCTTGACAGAGTGCTAACTAGACCTAGTCCCTGATTTCTCATTTAAT<br>TTCCTTGTGCCACCCACTGTGGAGTCAAAGACAAAACCCTTTTCCCTCCCACTTAACTATCTCT<br>GAAATGTCCAATTCTAGTTCCAGTACCAATTGATTCTCTGCACACCAGCCCTACTGAGAACATT<br>GTTGTCAGTGCCAGAATGGACGCGTCACCCCTTGATGGTGAGTTGATGGGCACCACCCAACCTTT<br>ACCTAGCCAAATCTGTGCTTTCAGGGGCATGCTCACCAGATCAACAAGCAGGGCCAGTGACCAGG<br>CCGATACAGCAACCCCTAGATTGTTAATTATTATTGGCATATACAATTGGATAACCTAAATGGA<br>ACTCCTTATGACCCTGCAGAAGATATACCAGGCCCTTAGGGACACCAGATTTCCGGGGCAAAGT<br>CTTTGGCGTGGCCAGCCAGAGAAATCCTGATGCCACGACTAGGGCAGTGAAGCAAAGATAGAC<br>ACAACATCTGGCCGCTTACCCCAAAATTAGGCTCACTAGAGATTTCCACTGAGTCTGGAGATTTT<br>GATCAAAACCAACCAACAAGATTCACCCAGTTGGCATTGGGGTTGACCATGAGGCAGATTTTCA<br>ACAATGGACTCTTCCCGACTATGCTGGCCAGTTCACCCACAACATGAACCTAGCCCCAGCTGTGTC<br>TCCCAACTTCCCTGGTGAGCAGTCTTTTCTCCGCTCACAGTTGCCATCTTCTGGTGGGCGGTCC<br>AACGGGATTCTAGACTGCCTGGTCCCCAAGAATGGGTACAGCACTTCTACCAAGAATCAGCCCC<br>CTCCAAACTCAAGTGGCCCTGGTTAGGTATGTCAACCCTGACACTGGTAGAGTGCTATTTGAGG<br>CCAAGCTGCACAAATTAGGTTTCATGACTATAGCCAAGAGTGGTACTCTCCAATAACTGTCCCC<br>CCAAATGGATACTTCAAGTTGAATCTTGGGTGAACCCCTTCTATACACTTGCCCCATGGGAACT<br>GGGAATGGGCGTAGAAGGATTCAACGGGATCCGTAA |
| VP1-GII.4 | ATGTCGGTTCTCATCATCATCATCATATAGCAGCGGCATCGAAGGCCGCGCCGCTTAATTAA<br>AACCATGGCAAAGTCGACTAAGATGGCGTCGAATGACGCCAACCCATCTGATGGGTCCGCAGCC<br>AACCTCGTCCCAGAGGTCAACAATGAGGTTATGGCTTTGGAGCCCGTTGTCGGTGCCGCTATTGC<br>GCGCCTGTAGCGGGCAACAAAATGTAATTGACCCTGGATCAGAAAATAATTTGTACAAGCCC<br>CTGGTGGAGAGTTCACAGTATCCCCTAGAAACGCTCCAGGTGAAATACTATGGAGCGCGCCCTTA<br>GGCCCTGATCTGAATCCCTACCTATCTCATTTGGCCAGAATGTATAATGGTTATGCAGGTGGTTTT<br>GAAGTGCAGGTGATCCTCGCGGGGAACGCGTTCACCGCCGAAAAATTAATTTGCAGCAGTCCC<br>ACCAAATTTCCAAGTGAAGGCTTGTAGTCCCAGCCAGGTCACTATGTTTCCCACATAATAGTAG<br>ATGTTAGGCAATTGGAACCTGTGTTGATTCCCTTACCTGATGTTAGGAATAACTTCTATCACTATA<br>ATCAGTCAAATGATTCTACCATTAATTTGATAGCAATGCTGTACACACCCTTAGGGCCAATAAT<br>GCCGGGATGATGTCTTACAGTCTCTTGTGCGAGTCTCAGGAGCCATCCCTGATTTTGACTTC<br>ATATTTTGGTGCCACCTACAGTTGAGTCAAGAATAAGCCATTTACTGTCCCAATCTTGACTGTT<br>GAAGAAATGACCAATTCAAGATCCCCATTCCTTTGGAAAAATGTTTACGGGTCCCAGCAGTGC<br>CTTTGTGTTCAACCACAAAATGGCAGATGCACGACTGATGGCGTGCTCTTAGGCACCACCCAAC                                                                                                                                                                                                                                                                                                                                                                                                                                                                                                                                                                                                                                                                                                                                                                                                                                                                                                      |

|                |                                                                                                                                                                                                                                                                                                                                                                                                                                                                                                                                                                                                                                                                                                                                                                                                                                                                                                             |
|----------------|-------------------------------------------------------------------------------------------------------------------------------------------------------------------------------------------------------------------------------------------------------------------------------------------------------------------------------------------------------------------------------------------------------------------------------------------------------------------------------------------------------------------------------------------------------------------------------------------------------------------------------------------------------------------------------------------------------------------------------------------------------------------------------------------------------------------------------------------------------------------------------------------------------------|
|                | <p>TGTCTCCTGTCAACATCTGCACCTTCAGAGGGGATGTCACCCACATTGCGGGTTCTCGTAATTACA<br/> CAATGAATTTGGCCTCTCTAAATTGGAACAATTATGACCCAACAGAAGAAATTCAGCCCCTCTG<br/> GGAACTCCAGATTTTCGTGGGAAAGATCCAAGGTGTGCTCACTCAAACCACAAAGGGAGATGGCT<br/> CGACCCGGGGCCATAAAGCTACAGTTTACACTGGGAGTGCCGACTTTACTCCAAAGCTGGGCAGT<br/> GTTCAATTTGCTACTGATACAGAAAATGATTTTGAAACTACCAAAAACACAAAATTCACCCCAGT<br/> CGGTGTCATCCAGGATGGTAGCACCACCCACCGAAATGAACCCCAACAATGGGTGCTCCCAAGTT<br/> ATTCAGGTAGAAATGTCCATAATGTACACCTAGCCCCTGCTGTAGCCCCCAATTTTCCGGGTGAAC<br/> AACTTCTTCTTCAGGTCCACTATGCCCGGATGCAGCGGGTATCCCAACACGGATTTGGATTGCC<br/> TACTCCCCCAGGAGTGGGTGCAGCACTTCTACCAAGAGGCAGCTCCAGCACAATCTGATGTGGCT<br/> CTATTGAGATTTGTGAATCCAGACACGGGTAGGGTCTTGTGTTGAGTGCAAACCTCATAAATCAGG<br/> TTATGTCACAGTGGCTCACACCGGCCAACATGATTTGGTCATCCCCCAATGGTTATTTTAGGTT<br/> TGATTCCTGGGTAAATCAATTCTATACACTCGCCCCATGGGAAATGGAACGGGGCGTAGACGTG<br/> CATTACGGGATCCGTAA</p> |
| <b>Primers</b> | <b>Sequence (5'-3')</b>                                                                                                                                                                                                                                                                                                                                                                                                                                                                                                                                                                                                                                                                                                                                                                                                                                                                                     |
| GII3__F        | ACGCG <u><b>GTCGAC</b></u> TAAGATGGCGTCAATGACG                                                                                                                                                                                                                                                                                                                                                                                                                                                                                                                                                                                                                                                                                                                                                                                                                                                              |
| GII3__R        | CGC <u><b>GGATCCC</b></u> GTGAATCCTTCTACGCC                                                                                                                                                                                                                                                                                                                                                                                                                                                                                                                                                                                                                                                                                                                                                                                                                                                                 |
| GII4__F        | ACGCG <u><b>GTCGAC</b></u> TAAGATGGCGTCAATGACG                                                                                                                                                                                                                                                                                                                                                                                                                                                                                                                                                                                                                                                                                                                                                                                                                                                              |
| GII4__R        | CGC <u><b>GGATCCC</b></u> GTGAATGCACGTCTACGCC                                                                                                                                                                                                                                                                                                                                                                                                                                                                                                                                                                                                                                                                                                                                                                                                                                                               |

**Figure S1.** Plasmid construction for expression of VP1-GII.3 and VP1-GII.4 in cell-free protein synthesis system. The target gene was inserted into pIVEX2.4c plasmid using the restriction enzymes *SalI* and *BamHI*.

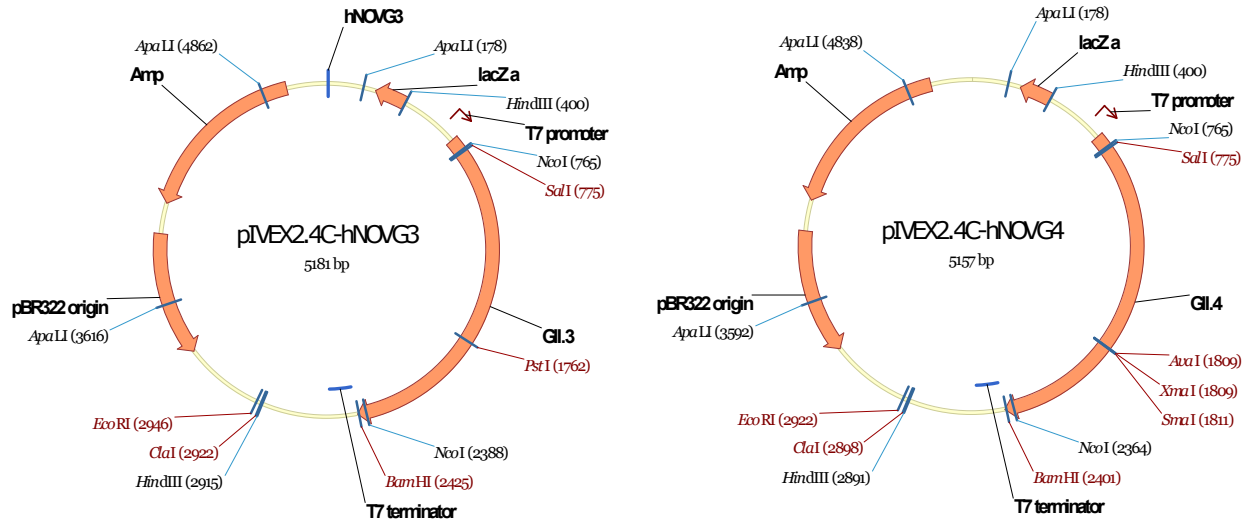

Supplement: c7ra03742b1.pdf [file c7ra03742b1.pdf]
